# Supplementary material for: Enhancing Protein–Ligand Binding Affinity Predictions Using Neural Network Potentials
Source: PubMed Central journal article supplement (PMC11214867; doi:10.1021/acs.jcim.3c02031), 2024-02-20
Supplement: NIHMS2004460-supplement-1.pdf [file NIHMS2004460-supplement-1.pdf]

## 9 Supporting Information

### Supporting Methods

Table S1: Percentage of predictions that have a MAE lower than 1 or 1.5 kcal/mol for each system.

| Protein | GAFF2      |             | NNP/MM ANI2x |             | FEP+        |             |
|---------|------------|-------------|--------------|-------------|-------------|-------------|
|         | % MAE < 1  | % MAE < 1.5 | % MAE < 1    | % MAE < 1.5 | % MAE < 1   | % MAE < 1.5 |
| CDK2    | 54.6 ± 4.9 | 71.1 ± 4.5  | 64.0 ± 9.3   | 96.0 ± 3.9  | 54.5 ± 10.3 | 86.4 ± 7.2  |
| JNK1    | 54.9 ± 4.7 | 79.6 ± 3.7  | 74.1 ± 8.3   | 88.9 ± 6.0  | 70.4 ± 8.9  | 85.2 ± 6.8  |
| p38     | 49.9 ± 2.5 | 65.4 ± 2.4  | 55.9 ± 6.2   | 81.4 ± 5.0  | 64.3 ± 6.3  | 83.9 ± 4.8  |
| TYK2    | 48.0 ± 3.6 | 68.4 ± 3.3  | 85.0 ± 5.6   | 97.5 ± 2.5  | 87.5 ± 7.9  | 87.5 ± 7.9  |
| hif2a   | 36.0 ± 4.6 | 55.9 ± 4.9  | 41.9 ± 8.6   | 58.1 ± 8.8  | 55.2 ± 8.9  | 75.9 ± 8.1  |
| pfkfb3  | 41.8 ± 3.6 | 60.4 ± 3.6  | 42.9 ± 6.2   | 65.1 ± 6.2  | 61.3 ± 6.1  | 80.6 ± 5.1  |
| syk     | 40.4 ± 4.6 | 61.4 ± 4.6  | 59.5 ± 8.0   | 78.4 ± 6.8  | 42.1 ± 8.0  | 73.7 ± 7.1  |
| tnks2   | 55.8 ± 5.2 | 70.5 ± 4.7  | 66.7 ± 7.1   | 77.8 ± 6.3  | 75.6 ± 6.2  | 88.9 ± 4.2  |

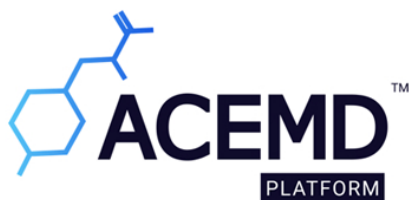

Step #1

Receptor  
Ligand A + Ligand B

Parameterize

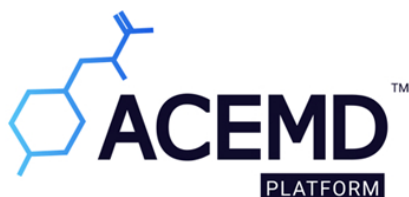

Step #2

Complex system set-up  
Move Ligand B based on vector

HTMD

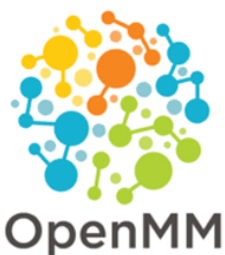

Step #3

Energy minimisation and equilibration  
Annealing at  $\lambda = 1/2$  and equilibration

OpenMM

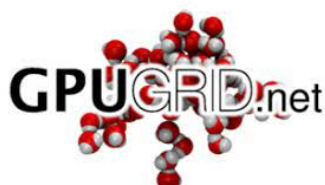

Step #4

Free energy calculations  
Asynchronous Replica Exchange  
22 x  $\approx 3$ ns per  $\lambda$

OpenMM

Step #5

Results analysis

UWHAM

Figure S1: The ATM workflow used in this work. Ligands topologies are calculated with *parameterize* with GAFF2 and Sage force fields. (2) System complexes are prepared and built with *htmd*<sup>19</sup>. Protein topologies are prepared with the Amber ff14SB force field. Next ligand B is displaced based on a vector. (3) Energy minimization and equilibration is performed. Later an annealing and equilibration at  $\lambda=1/2$  is performed. (4) Replica Exchange simulations are performed for a total sampling of 60ns. ATM simulations were run in GPU GRID were as ATM-NNP calculations were performed in our local cluster.(5) After the simulations were finished, these were analyzed with the UWHAM package to obtain the calculated  $\Delta\Delta G$  estimates.

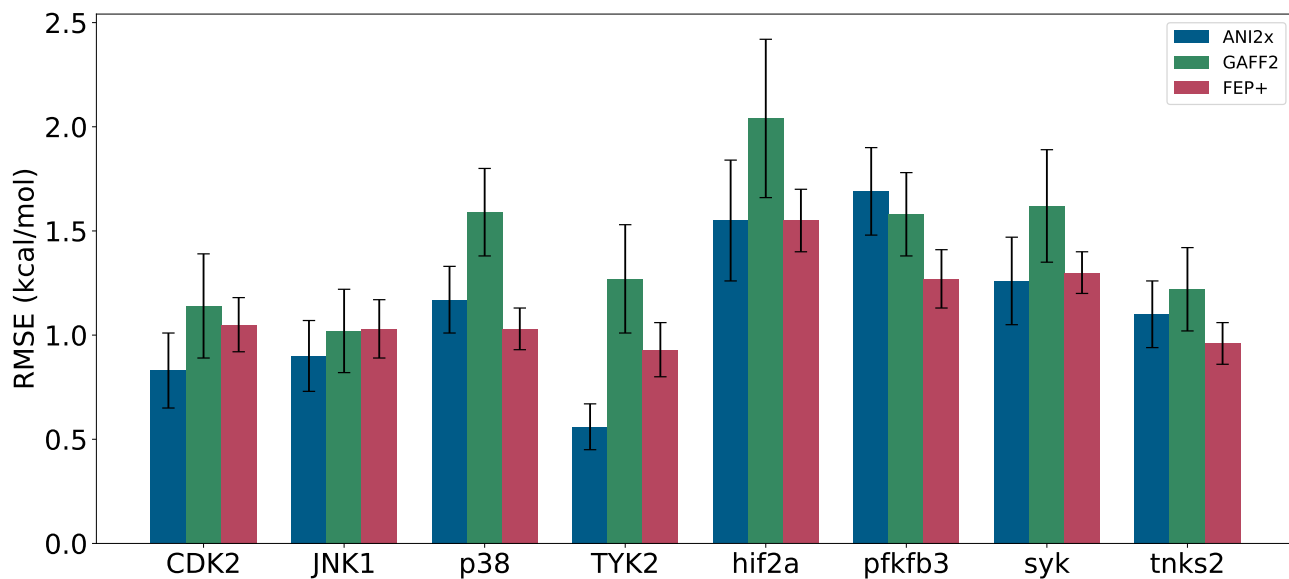

Figure S2: Pearson correlation for each protein-ligand system calculated in combination with different force fields and reported estimates using FEP+

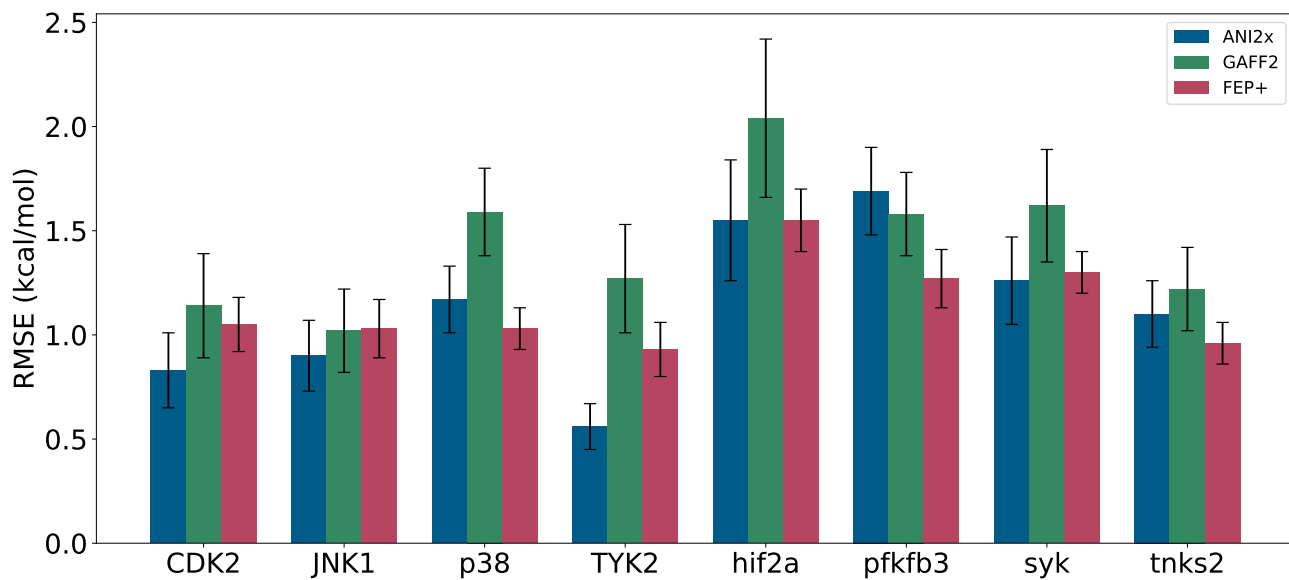

Figure S3: Root Mean Square Error (RMSE) in kcal/mol for each protein-ligand system calculated in combination with different force fields and reported estimates using FEP+

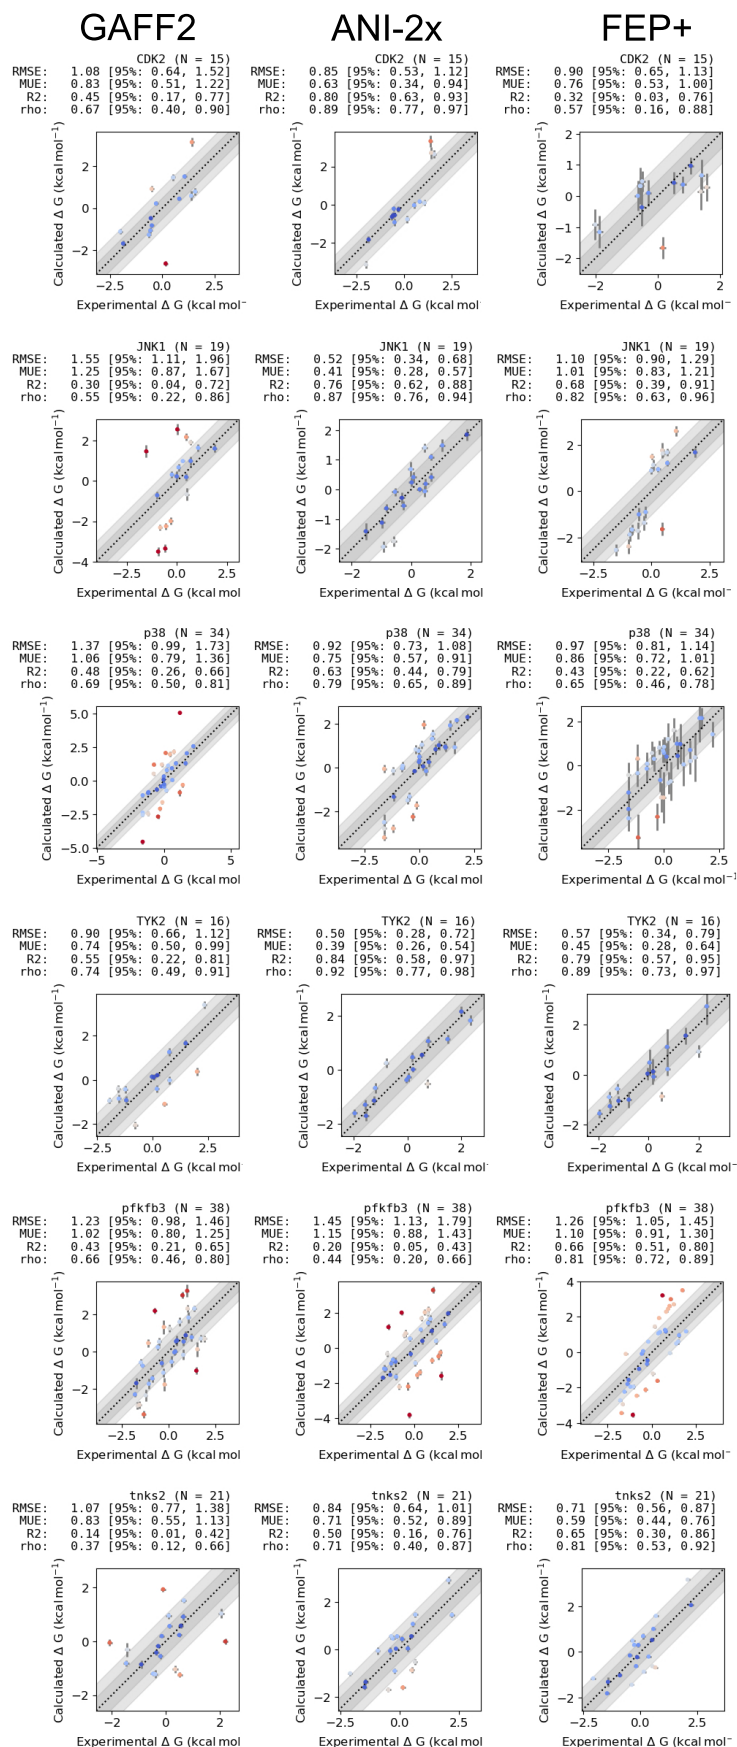

Figure S4: Scatterplots for the  $\Delta G$  calculated on all the connected systems. Comparison between GAFF2, NNP/MM and FEP+.

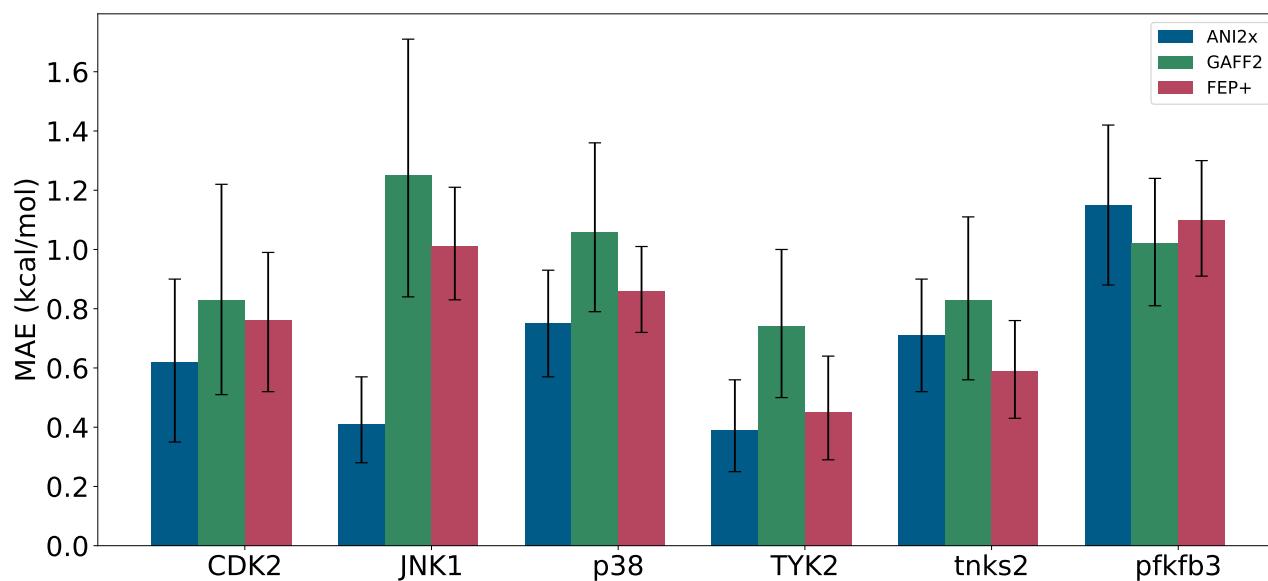

Figure S5: MAE (kcal/mol) for the  $\Delta G$  values on all the connected systems

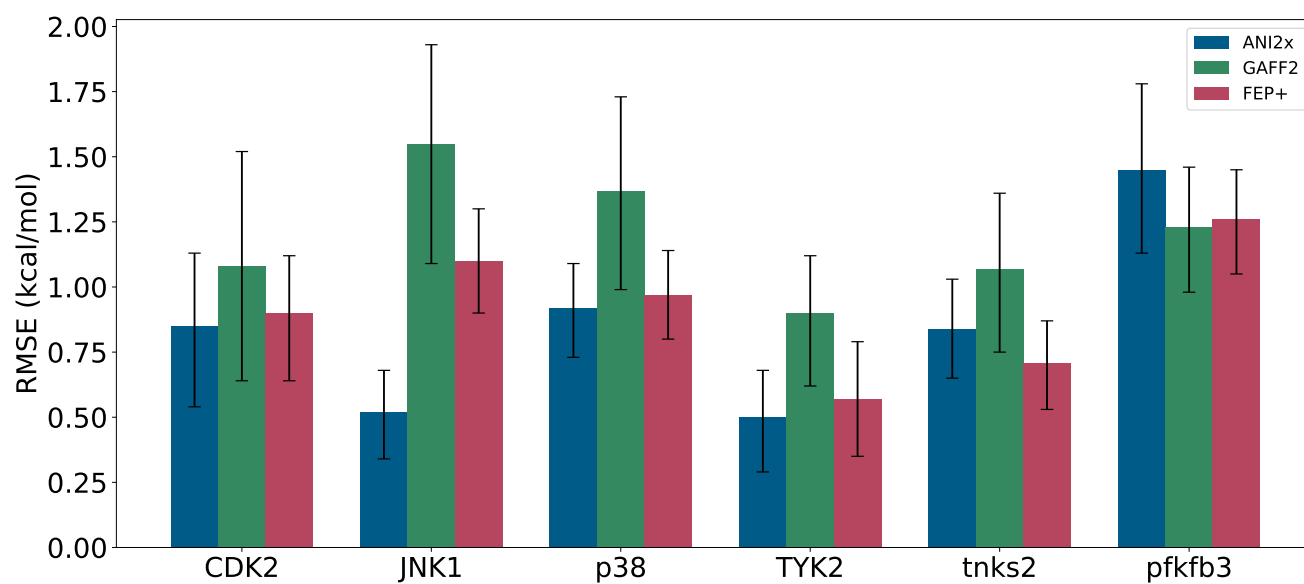

Figure S6: RMSE (kcal/mol) for the  $\Delta G$  values on all the connected systems

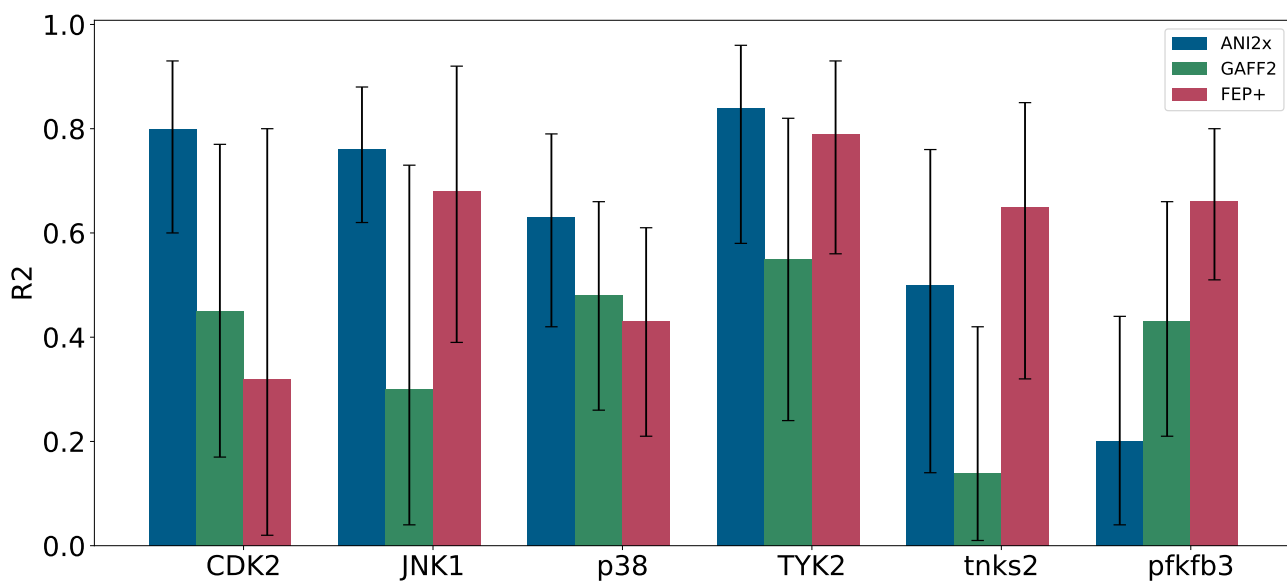

Figure S7: R2 correlation for the  $\Delta G$  values on all the connected systems

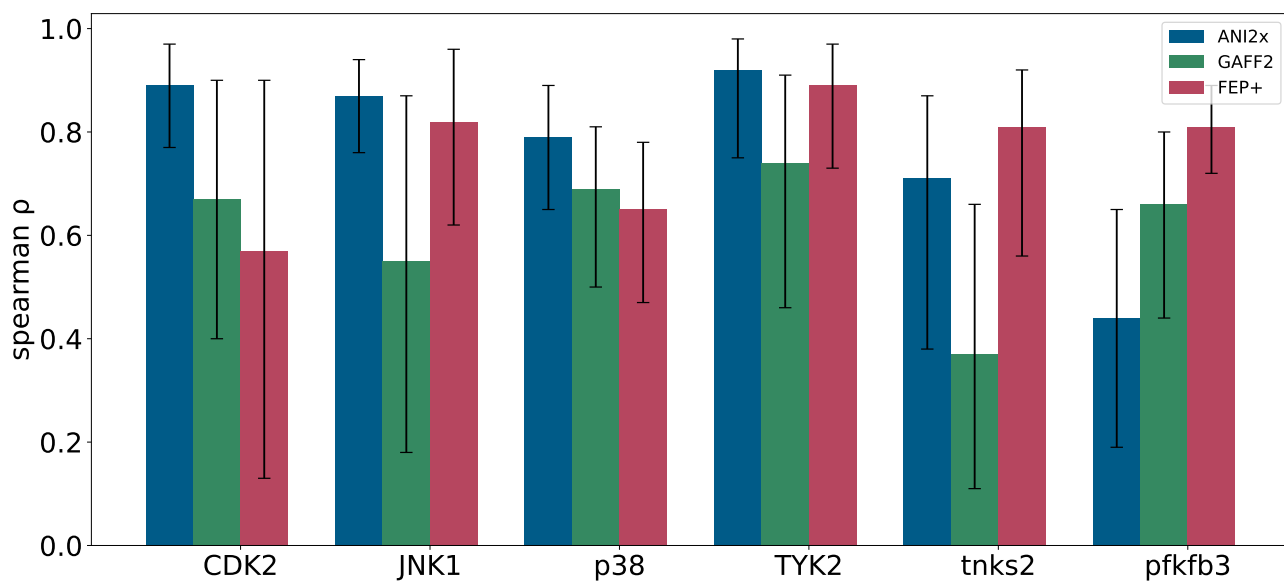

Figure S8: Spearman correlation for the  $\Delta G$  values on all the connected systems

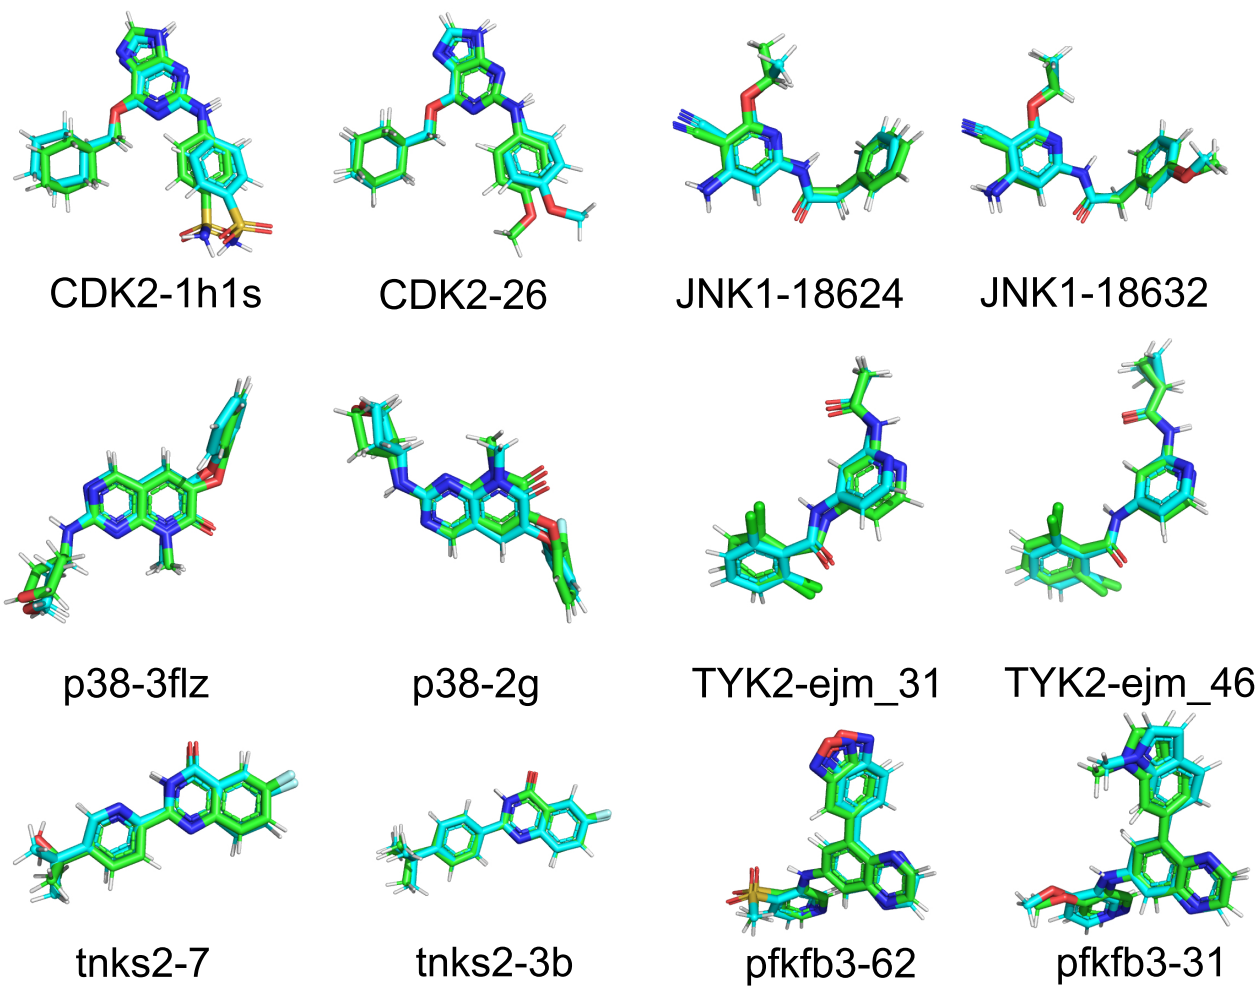

Figure S9: Generated conformers after equilibration for runs performed with GAFF2 (cyan) and ANI-2x (green).

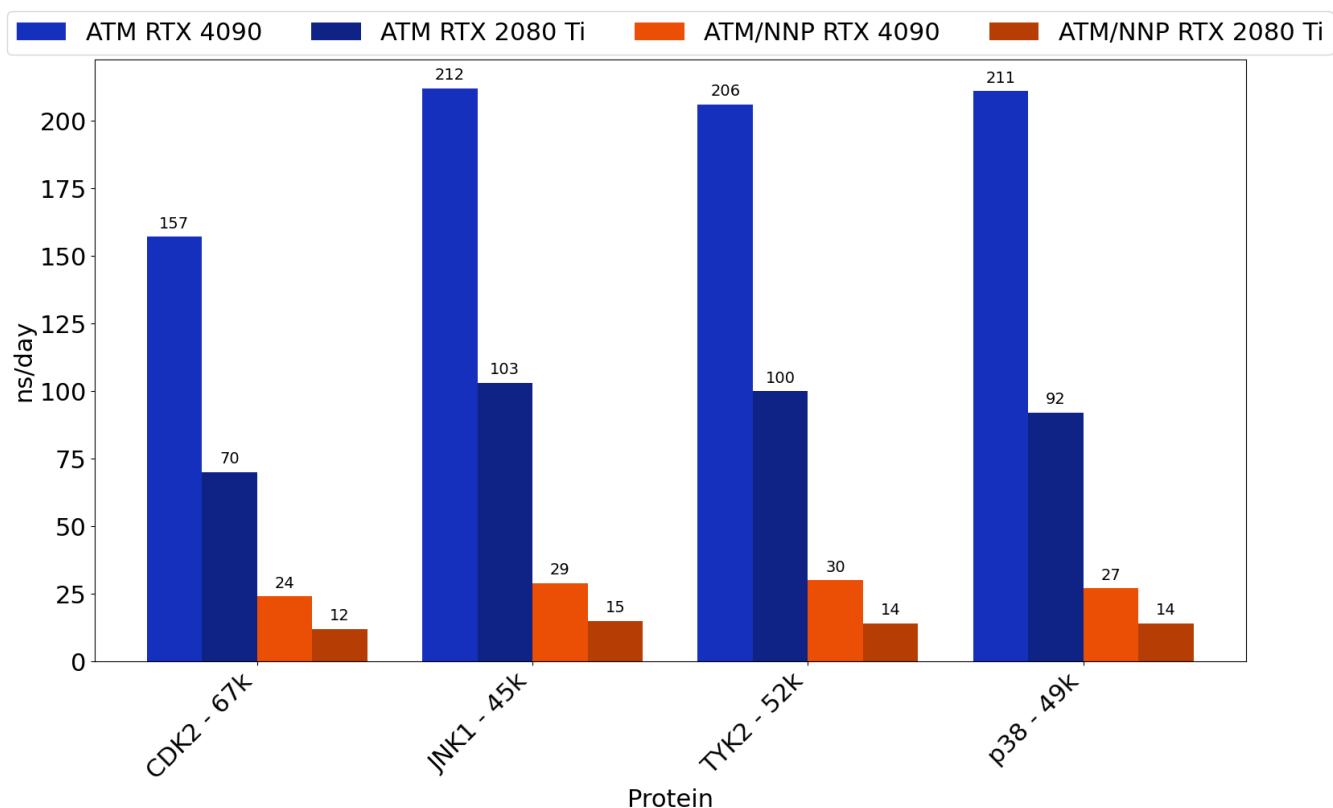

Figure S10: Performance of ATM and ATM/NNP on RTX 2080Ti and RTX 4090 graphics cards with OpenMM 7.7 MD engine and the ATM Meta Force plugin using the CUDA platform

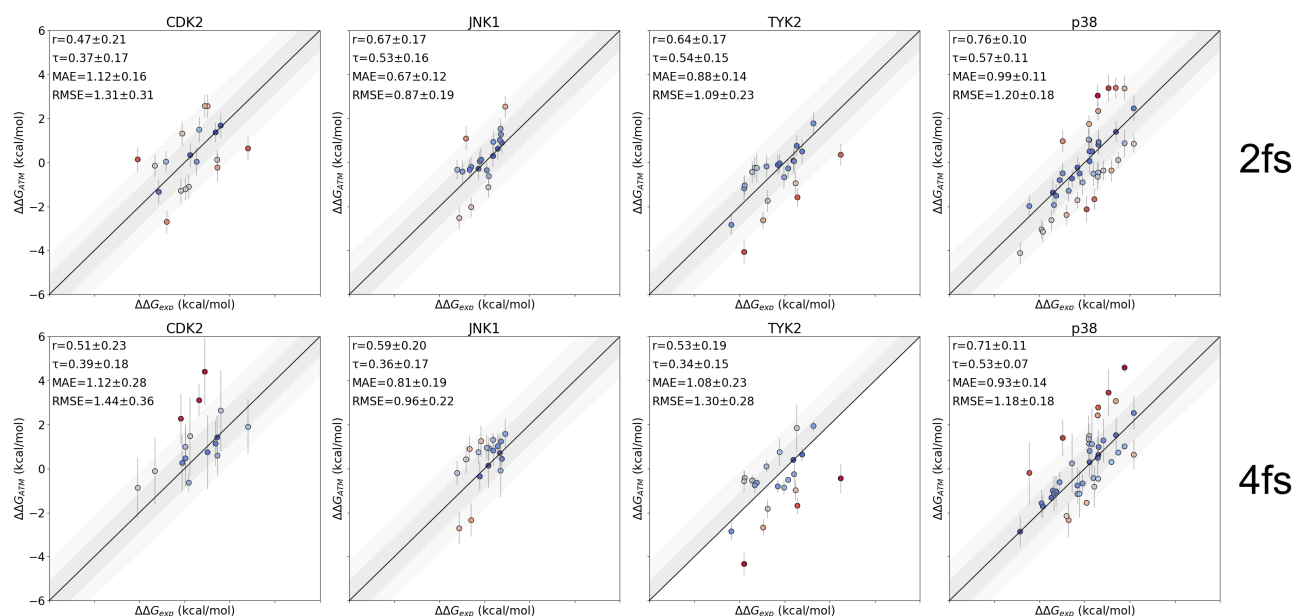

Figure S11: Scatterplots for a series of targets studied at different timesteps. Top row are the relevant ligand pairs studied in our previous work, which we realized with a 2fs timestep. Bottom row are the calculations done for these targets at a 4fs timestep.



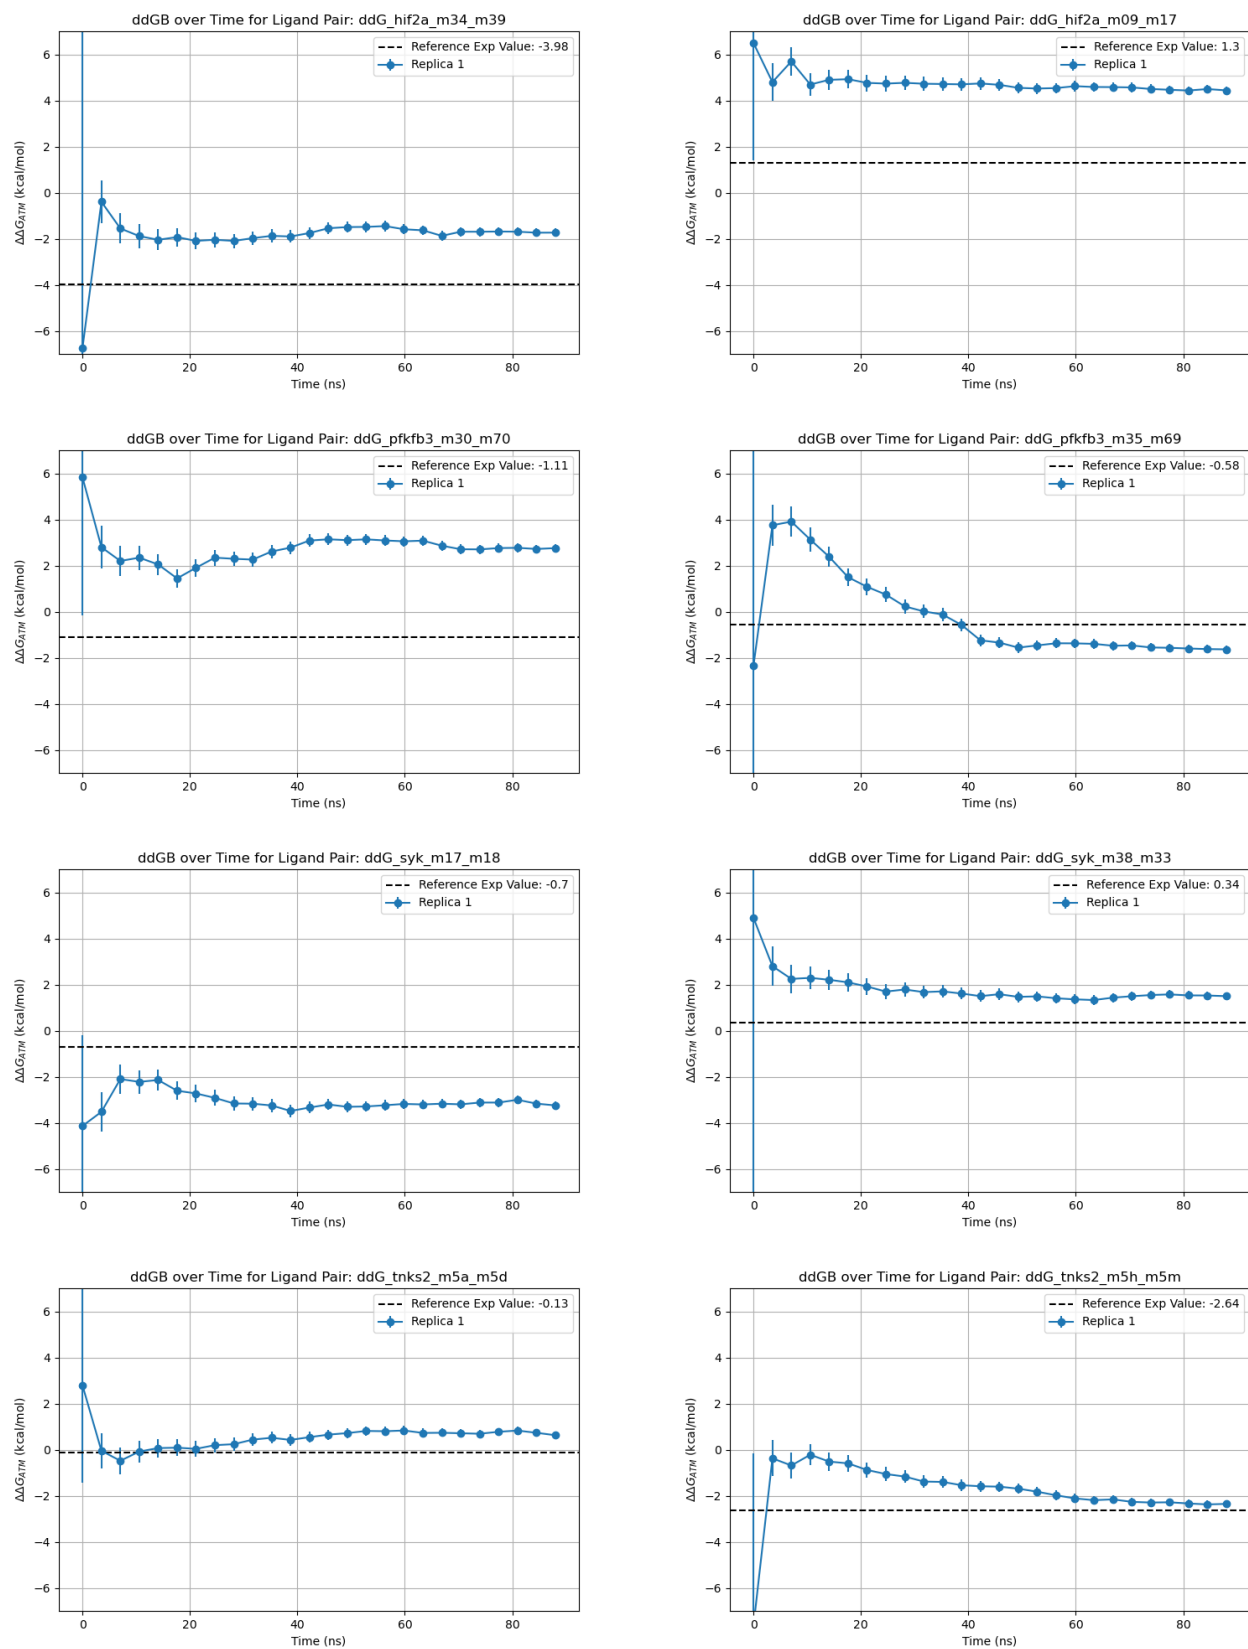

Figure S12: Free energy convergence as a function of time for a series of ligand pairs of hif2a, pfkfb3, syk and tnks2

Table S2: Case study example of the  $\Delta\Delta G$ s obtained with NNP/MM and GAFF2. We observe how the transformations with the ligand ejm\_55 give poor results with the GAFF2 (highlighted red) calculations but in the case of NNP/MM (highlighted green) the MAE is below 1kcal/mol.

| Protein: TYK2 |         |         | NNP/MM ANI2x |       |             | GAFF2   |       |             |
|---------------|---------|---------|--------------|-------|-------------|---------|-------|-------------|
| ligand1       | ligand2 | exp_ddG | ATM_ddG      | error | MAE         | ATM_ddG | error | MAE         |
| ejm_31        | ejm_46  | -1.77   | -2.27        | 0.25  | 0.50        | -0.42   | 0.24  | 1.35        |
| ejm_31        | ejm_43  | 1.28    | 1.36         | 0.22  | 0.07        | 1.94    | 0.23  | 0.66        |
| ejm_31        | jmc_28  | -1.44   | -1.33        | 0.22  | 0.11        | -0.54   | 0.23  | 0.90        |
| ejm_31        | ejm_45  | -0.02   | 0.17         | 0.23  | 0.19        | -0.86   | 0.23  | 0.84        |
| ejm_31        | ejm_48  | 0.54    | -0.56        | 0.24  | 1.10        | 1.84    | 0.24  | 1.30        |
| ejm_50        | ejm_42  | -0.80   | -0.37        | 0.22  | 0.43        | 0.10    | 0.22  | 0.90        |
| ejm_55        | ejm_54  | -1.32   | -0.55        | 0.22  | 0.77        | -0.76   | 0.23  | 0.56        |
| ejm_43        | ejm_55  | -0.95   | -0.33        | 0.23  | <b>0.62</b> | -2.68   | 0.23  | <b>1.73</b> |
| jmc_28        | jmc_30  | 0.04    | 0.57         | 0.26  | 0.53        | -1.07   | 0.28  | 1.11        |
| jmc_28        | jmc_27  | -0.30   | -0.50        | 0.22  | 0.20        | -0.80   | 0.22  | 0.50        |
| ejm_49        | ejm_31  | -1.79   | -2.57        | 0.24  | 0.78        | -0.57   | 0.24  | 1.22        |
| ejm_49        | ejm_50  | -1.23   | -0.86        | 0.24  | 0.38        | -0.64   | 0.24  | 0.59        |
| ejm_45        | ejm_42  | -0.22   | -0.96        | 0.22  | 0.74        | 0.75    | 0.23  | 0.97        |
| ejm_44        | ejm_55  | -1.79   | -2.11        | 0.24  | <b>0.32</b> | -4.33   | 0.23  | <b>2.54</b> |
| ejm_44        | ejm_42  | -2.36   | -1.65        | 0.27  | 0.71        | -2.85   | 0.24  | 0.49        |
| ejm_47        | ejm_31  | 0.16    | 0.09         | 0.22  | 0.07        | -0.51   | 0.23  | 0.67        |
| ejm_47        | ejm_55  | 0.49    | 0.04         | 0.22  | 0.44        | -0.98   | 0.23  | 1.47        |
| jmc_23        | jmc_30  | 0.76    | 0.87         | 0.27  | 0.11        | -0.25   | 0.25  | 1.01        |
| jmc_23        | ejm_46  | 0.39    | 0.33         | 0.22  | 0.06        | 0.40    | 0.22  | 0.01        |
| jmc_23        | ejm_55  | 2.49    | 1.77         | 0.23  | <b>0.72</b> | -0.44   | 0.23  | <b>2.93</b> |
| jmc_23        | jmc_27  | 0.42    | -0.67        | 0.24  | 1.09        | -0.25   | 0.22  | 0.67        |
| ejm_42        | ejm_55  | 0.57    | 1.14         | 0.22  | <b>0.57</b> | -1.68   | 0.22  | <b>2.25</b> |
| ejm_42        | ejm_48  | 0.78    | 0.53         | 0.22  | 0.25        | 0.64    | 0.23  | 0.14        |
| ejm_42        | ejm_54  | -0.75   | -0.12        | 0.22  | 0.62        | -1.83   | 0.22  | 1.08        |

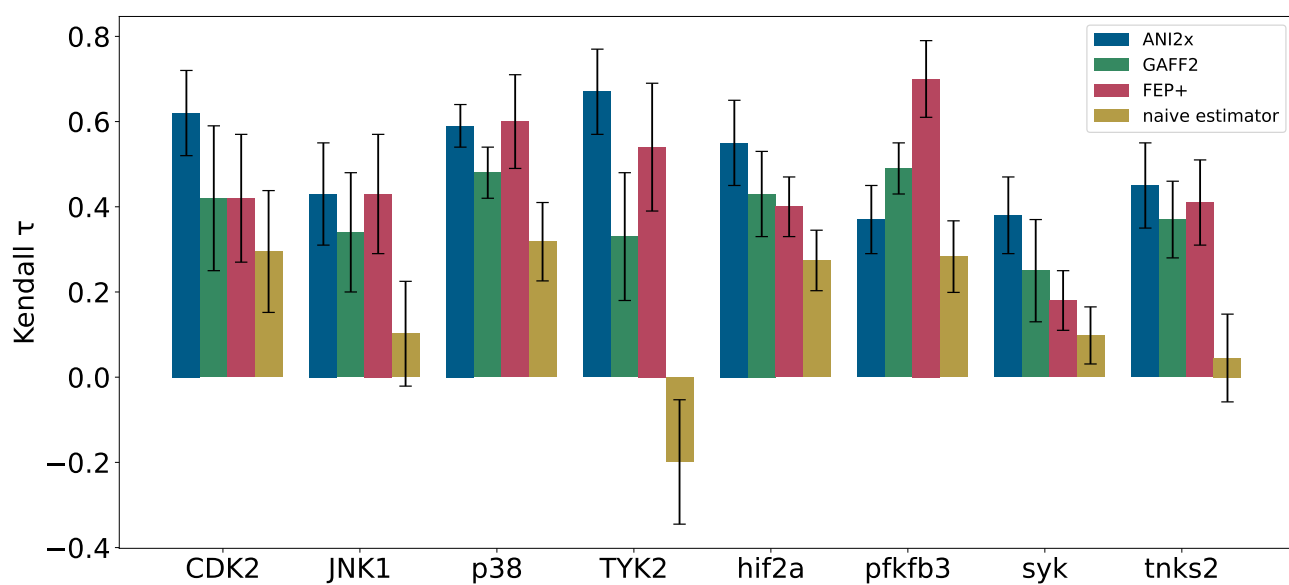

Figure S13: Comparison of Kendall tau for the  $\Delta\Delta G$ s of each protein-ligand system calculated and compared against a naive estimator based on the difference of molecular weight between ligands
